# Supplementary material for: Label-free assessment of a microfluidic vessel-on-chip model with visible-light optical tomography reveals structural changes in vascular networks
Source: Royal Society of Chemistry journal article supplement (doi:10.1039/d5lc00927h), 2026-01-01
Supplement: d5lc00927h1.pdf [file d5lc00927h1.pdf]

## **Supplementary file for**

### **Label-free assessment of a microfluidic vessel-on-chip model with visible-light optical tomography reveals structural changes in vascular networks**

Devin Veerman, Carlos Cuartas-Vélez, Tarek Gensheimer, Tomas van Dorp, Andries van der Meer and Nienke Bosschaart

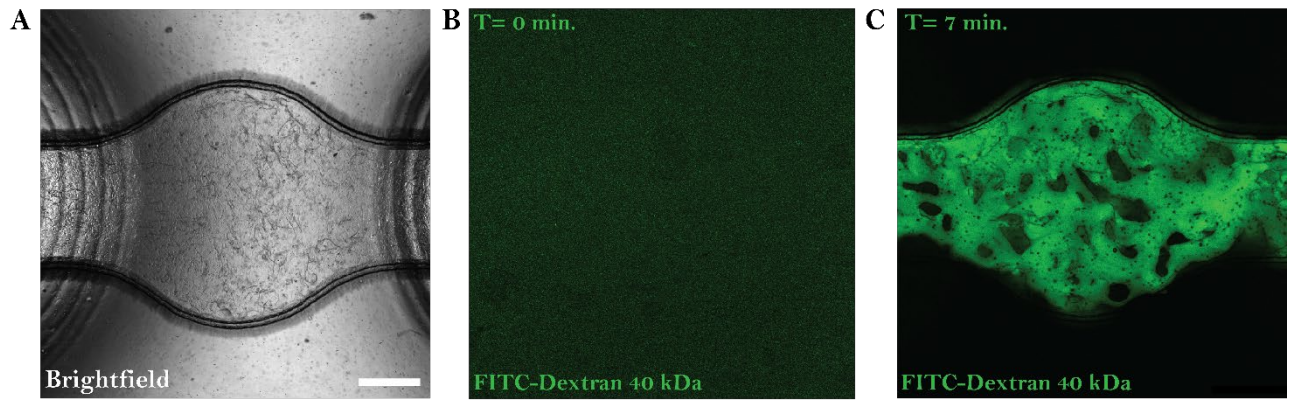

**Fig. S1** Perfusability of the vascular network in the VoC at day 3 of culture. **A)** Brightfield image of the formed vessels at day 3. **B)** Maximum intensity projection of the VoC before FITC-Dextran 40 kDa was added to the left reservoir. **C)** Maximum intensity projection of the VoC after FITC-Dextran 40 kDa was added to the left reservoir and incubated for 7 minutes. Representative images shown, scale bar = 500  $\mu\text{m}$ .

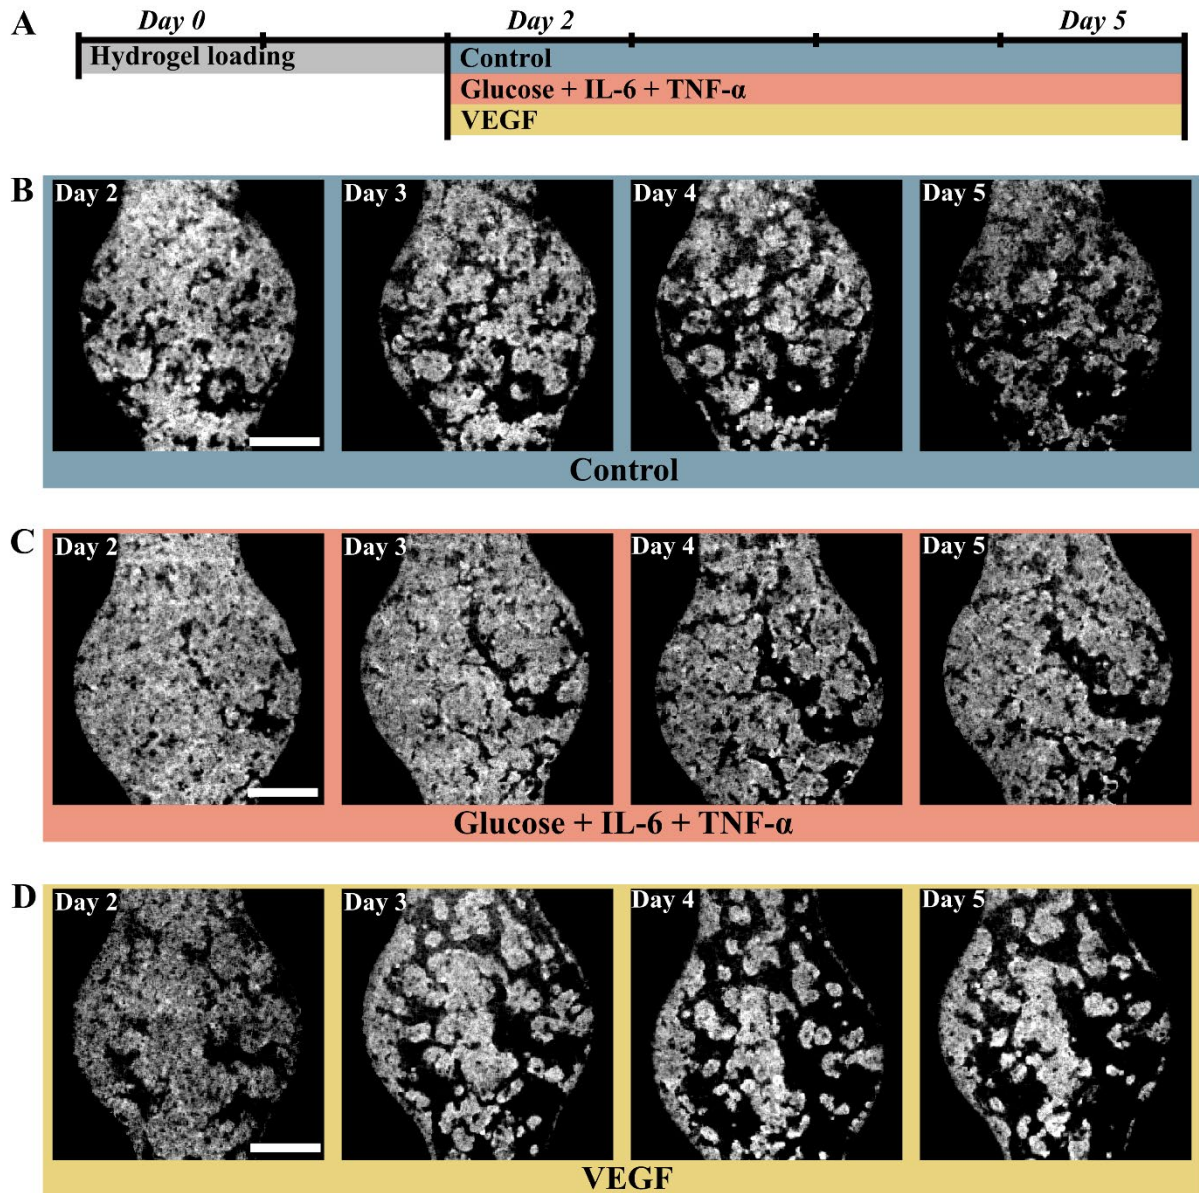

**Fig. S2** Time-resolved imaging of vascular network development in vessel-on-chip by optical coherence tomography. **A)** Timeline of disease modeling. Vessel-on-chips were loaded and vessels were allowed to grow for 2 days. Thereafter, the vascular network was subjected to control medium, medium with high glucose and added TNF- $\alpha$  and IL-6, and VEGF medium for 3 more days. Vessel-on-chips were measured every day after day 2. **B)** Minimum intensity projections, showing the change in the vascular network in the control condition over the course of 5 days. **C)** Minimum intensity projections, displaying changes in vascular network for the high glucose with added TNF- $\alpha$  and IL-6 condition over the course of 5 days. **D)** Minimum intensity projections, exhibiting changes in the vascular network for the VEGF condition over the course of 5 days. Representative images shown, scale bar = 500  $\mu$ m.

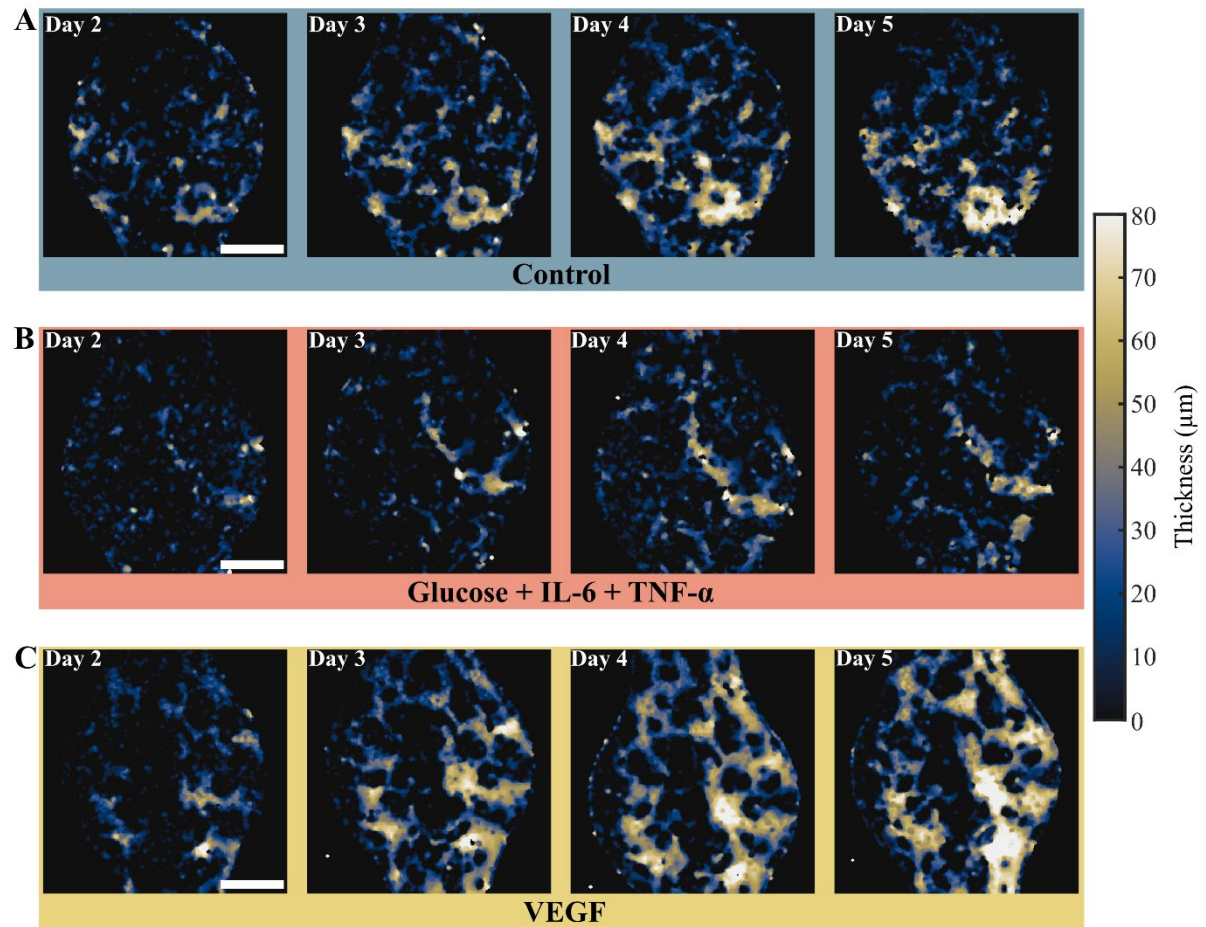

**Fig. S3** Change in vessel thickness in the vessel-on-chip over the treatment period, for the different treatments. **A)** control condition on day 2 to 5, **B)** high glucose with added TNF- $\alpha$  and IL-6 condition over the course of 5 days, and **C)** VEGF condition over the course of 5 days. Representative images shown, scale bar = 500  $\mu\text{m}$ .

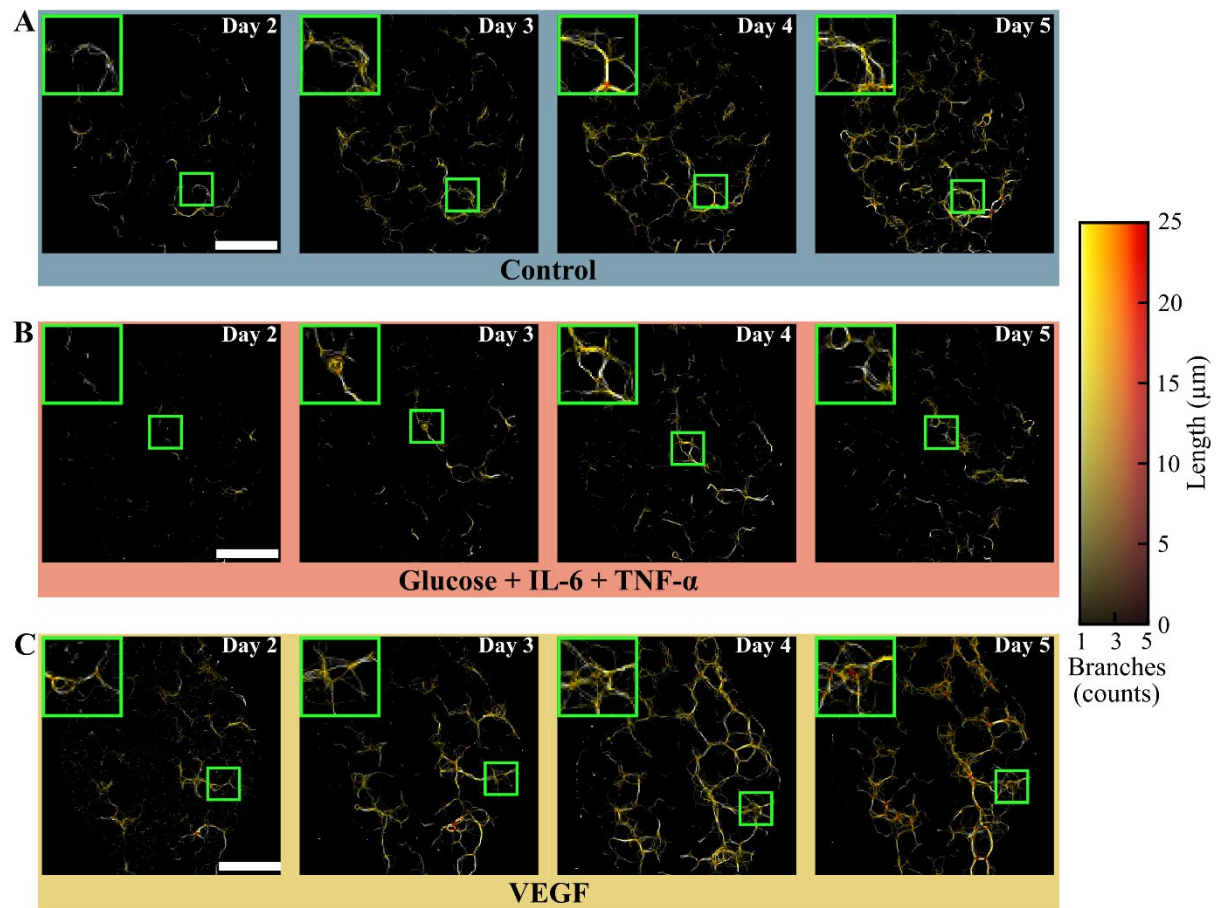

**Fig. S4** Overlay of the variation in the number of branches and vessel length under the different conditions during treatment of the vessel-on-chip for **A)** the control condition on day 2 to 5, **B)** high glucose with added TNF- $\alpha$  and IL-6 condition over the course of 5 days, and **C)** VEGF condition over the course of 5 days. Representative images shown, scale bar = 500  $\mu\text{m}$ .
